# Supplementary material for: Evidence for Overlapping and Distinct Biological Activities and Transcriptional Targets Triggered by Fibroblast Growth Factor Receptor 2b Signaling between Mid- and Early Pseudoglandular Stages of Mouse Lung Development
Source: PubMed Central journal article supplement (PMC7290466; doi:10.3390/cells9051274), 2020-05-21
Supplement: cells-09-01274-s001.pdf [file cells-09-01274-s001.pdf]

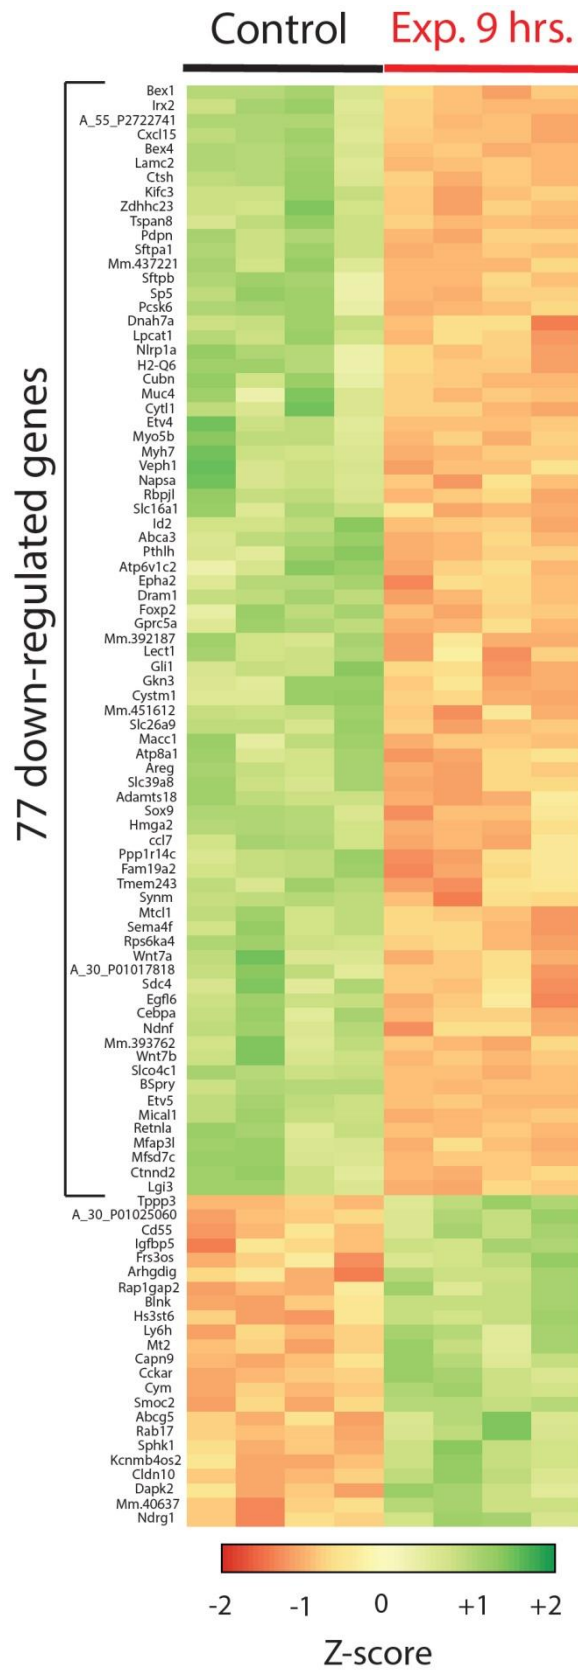

**Figure S1: Enlarged heatmap from Figure 1D showing the top 100 regulated genes (according to p-value) from E14.5 + 9 hours gene array.**

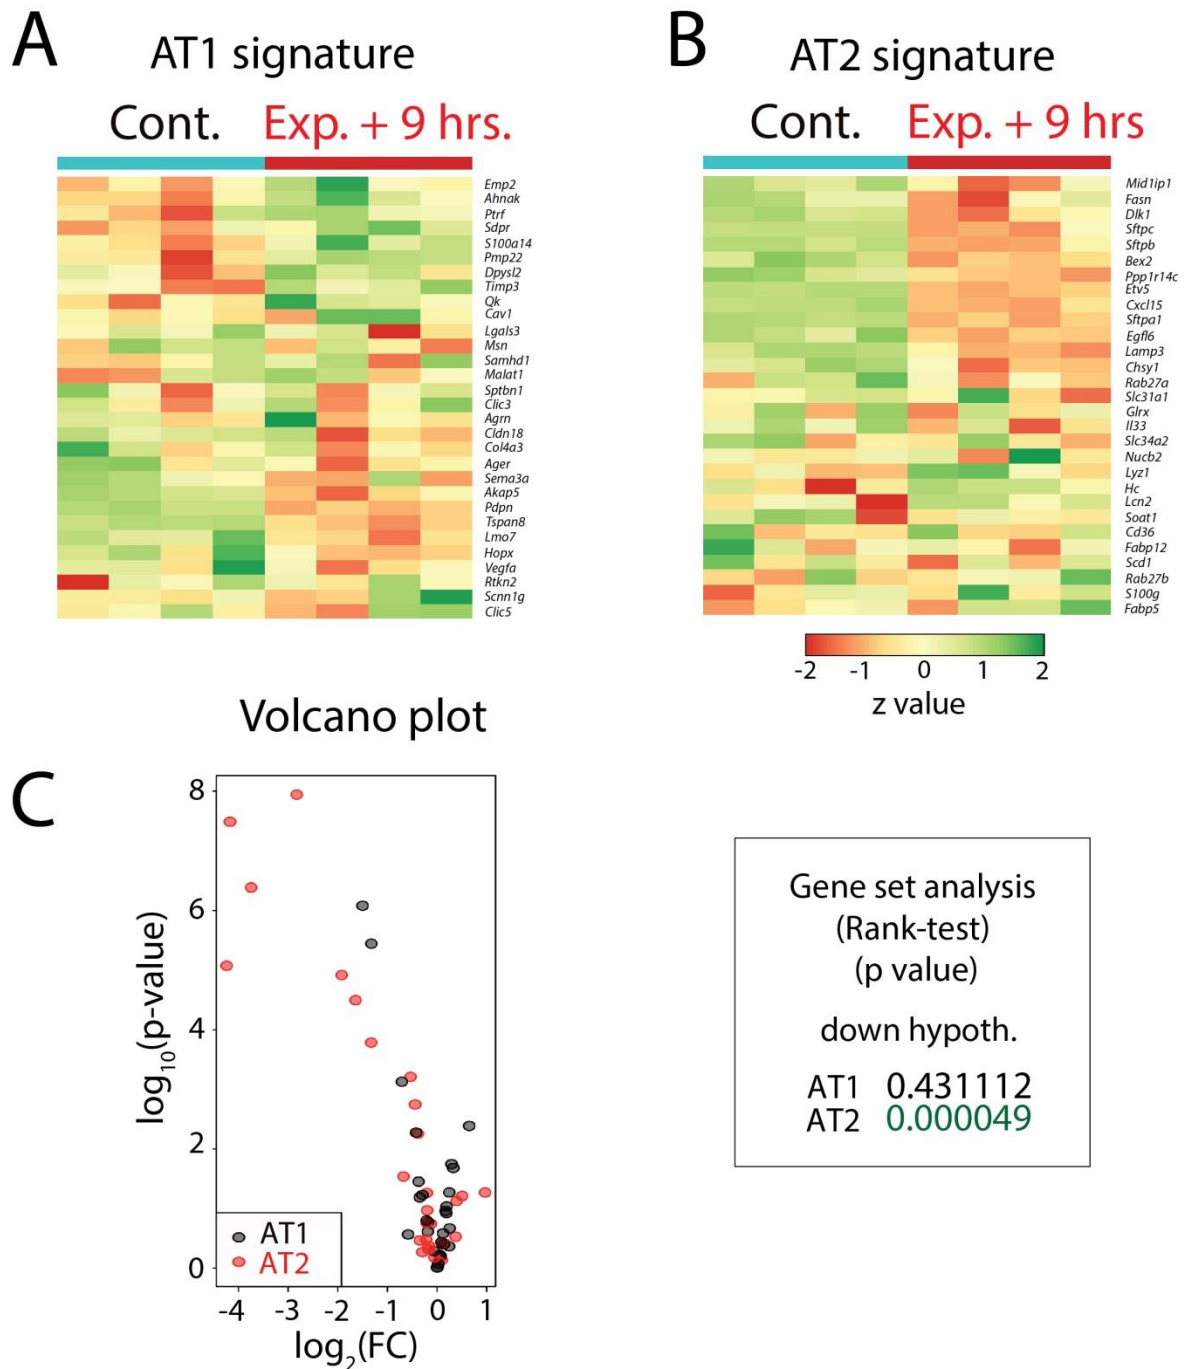

**Figure S2: Experimental lungs (E14.5 + 9 hrs.) display impaired AT2, but not AT1, differentiation. (A)** Heatmap for the AT1 and **(B)** AT2 gene signature using the E14.5 + 9 hrs. experimental and control lungs. **(C)** Corresponding volcano plot and **(D)** gene set analysis showing a significant downregulation of the AT2 ( $p=0.000049$ ), but not the AT1, signature.

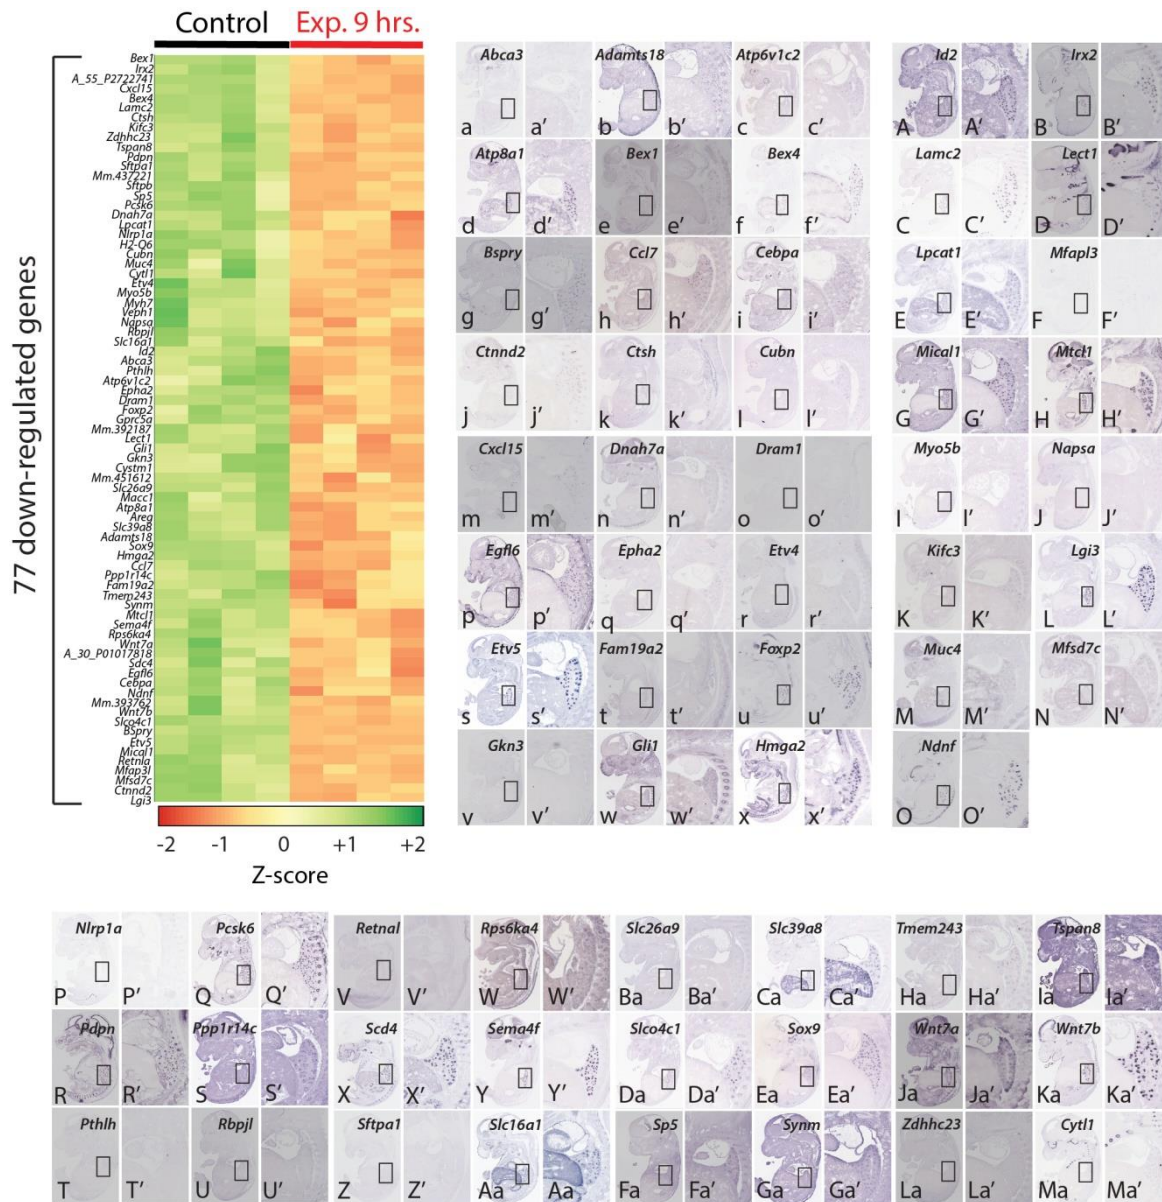

**Figure S3: Expression patterns of genes directly regulated after 9 hours by Fgfr2b signaling in E14.5 lungs. (A)** Heatmap for the 77 genes downregulated from the top 100 regulated genes, constituting the Fgfr2b ligands signature at E14.5. **(B)** Corresponding *in situ* hybridization expression patterns for the identified genes (from 'Genepaint').

**Table S1: Primary and secondary antibodies**

| Antibody             | Host   | Dilution | Company (Cat. number)   |
|----------------------|--------|----------|-------------------------|
| Acetylated a-Tubulin | Mouse  | 1:1000   | Sigma (T6793)           |
| Aqp5                 | Rabbit | 1:200    | CalBiochem (178615)     |
| Cdh1                 | Mouse  | 1:200    | BD Biosciences (610181) |
| Hopx                 | Rabbit | 1:200    | Sigma (HPA030180)       |
| Ki67                 | Rabbit | 1:200    | Cell Signaling (9129)   |
| Scgb1a1              | Goat   | 1:100    | Santa Cruz (sc-9772)    |
| Sftpc                | Rabbit | 1:500    | Millipore (AB3786)      |

|                             |        |       |                     |
|-----------------------------|--------|-------|---------------------|
| Alexa Fluor 555 anti-rabbit | Goat   | 1:500 | Invitrogen (A21429) |
| Alexa Fluor 488 anti-goat   | Donkey | 1:500 | Invitrogen (A11055) |
| Alexa Fluor 555 anti-mouse  | Donkey | 1:500 | Invitrogen (A31570) |
| Alexa Fluor 568 anti-goat   | Rabbit | 1:500 | Invitrogen (A11079) |
| Alexa Fluor 488 anti-rabbit | Goat   | 1:500 | Invitrogen (A11034) |

**Table S2: qPCR primers**

| <b>Gene</b>    | <b>Forward primer</b>               | <b>Reverse primer</b>            | <b>Expected product size</b> |
|----------------|-------------------------------------|----------------------------------|------------------------------|
| <i>Aqp5</i>    | 5'-TAA CCT GGC CGT CAA TGC-3'       | 5'-GCC AGC TGG AAA GTC AAG AT-3' | 84 bp                        |
| <i>Etv5</i>    | 5'-TAG CTG AAG CAC AAG TTC CTG A-3' | 5'-GCA GCT CCC GTT TGA TCT TG-3' | 105 bp                       |
| <i>Hprt</i>    | 5'-TCC TCC TCA GAC CGC TTT TT-3'    | 5'-ATC ATC GCT AAT CAC GAC GC-3' | 82 bp                        |
| <i>Scgb1a1</i> | 5'-GAT CGC CAT CAC AAT CAC TG-3'    | 5'-CAG ATG TCC GAA GAA GCT GA-3' | 66 bp                        |
| <i>Sftpc</i>   | 5'-GGT CCT GAT GGA GAG TCC AC-3'    | 5'-GAT GAG AAG GCG TTT GAG GT-3' | 94 bp                        |
| <i>Sox9</i>    | 5'-AGT CGG TGA AGA ACG GAC AA-3'    | 5'-CTG AGA TTG CCC AGA GTG C-3'  | 158 bp                       |
